# Supplementary material for: Effect of Temperature on the Expression of Classical Enterotoxin Genes among Staphylococci Associated with Bovine Mastitis
Source: MDPI journal article supplement (doi:10.3390/pathogens10080975), 2021-08-02
Supplement: s1 [file s1]

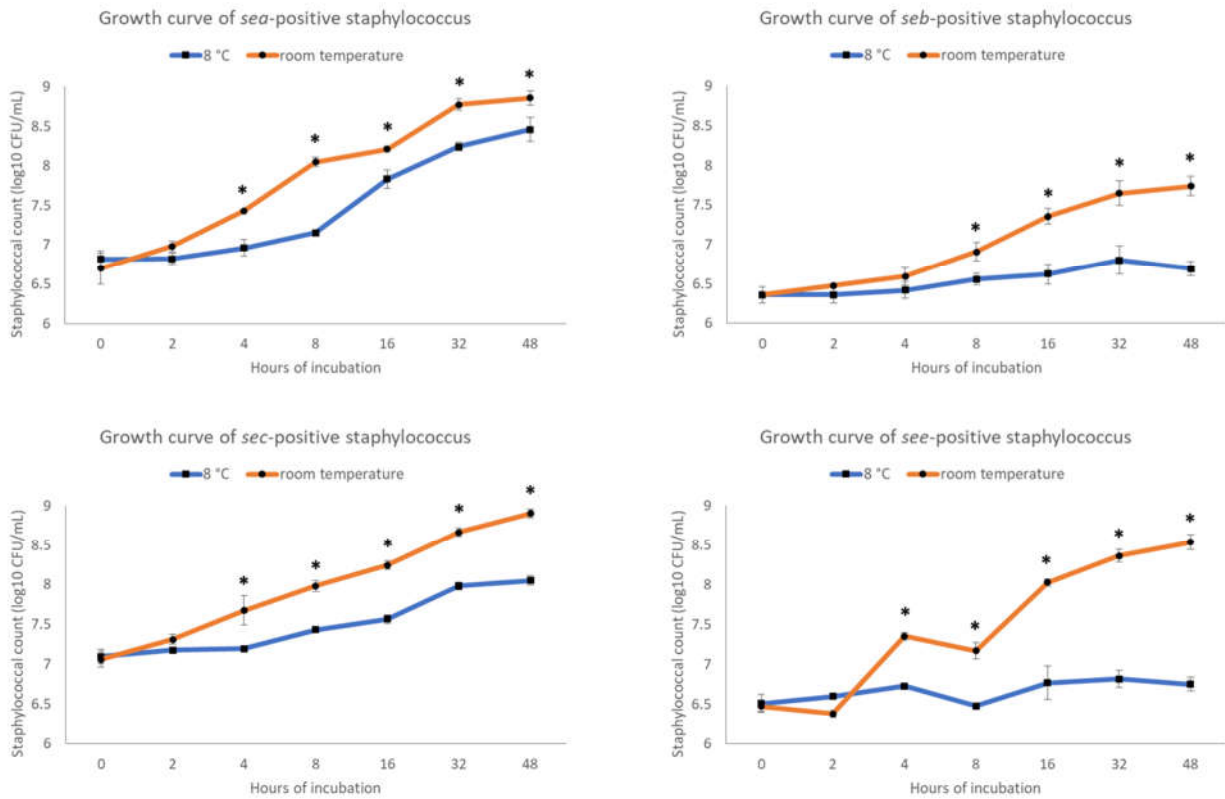

**Figure S1.** Growth curve of *sea*-, *seb*-, *sec*-, and *see* positive staphylococci in UHT milk incubated at 8 °C and room temperature. Asterisks indicate statistically significant comparisons of staphylococcal count at both temperature at each hour of incubation.

**Table S1.** Sequences of PCR primers used to identify *Staphylococcus* species and detect classical staphylococcal enterotoxin genes.

| Gene       | Primer | Oligonucleotides sequence (5'-3') | Product (bp) | Annealing temperature | References |
|------------|--------|-----------------------------------|--------------|-----------------------|------------|
| <i>sea</i> | sea-F  | CAGCATACTATATTGTTTAAAGGC          | 400          | 53 °C                 | [1]        |
|            | sea-R  | CCTCTGAACCTTCCCATC                |              |                       |            |
| <i>seb</i> | seb-F  | TCGCATCAAACCTGACAAACG             | 478          | 50 °C                 | [2]        |
|            | seb-R  | GCAGGTACTCTATAAGTGCC              |              |                       |            |
| <i>sec</i> | sec-F  | CTCAAGAACTAGACATAAAAGCTAGG        | 271          | 53 °C                 | [3]        |
|            | sec-R  | TCAAAATCGGATTAACATTATCC           |              |                       |            |
| <i>sed</i> | sed-F  | CTAGTTTGGAATATCTCCTTTAAACG        | 319          | 53 °C                 | [3]        |
|            | sed-R  | TTAATGCTATATCTTATAGGGTAAACA TC    |              |                       |            |
| <i>see</i> | see-F  | CAGTACCTATAGATAAAAGTTAAACAAG      | 178          | 53 °C                 | [3]        |
|            | see-R  | CTAACTTACCGTGACCCCTTC             |              |                       |            |
| <i>nuc</i> | nuc-F  | GCGATTGATGGTGATACGGTT             | 279          | 62 °C                 | [4]        |
|            | nuc-R  | AGCCAAGCCTTGACGAAGTAAAGC          |              |                       |            |
| 16S rRNA   | 16S-F  | AACTCTGTTATTAGGGAAGAAGAACA        | 756          | 62 °C                 | [4]        |
|            | 16S-R  | CCACCTTCCTCCGGTTTGTCACC           |              |                       |            |

**Table S2.** Sequences of qPCR primers used to estimate the expression of classical staphylococcal enterotoxin genes.

| Gene       | Primer | Oligonucleotides sequence (5'-3') | Product (bp) | References |
|------------|--------|-----------------------------------|--------------|------------|
| <i>sea</i> | sea-F  | AAAATACAGTACCTTTGGAAACGGTT        | 92           | [5]        |
|            | sea-R  | TTTCCTGTAAATAACGTCTTGCTTGA        |              |            |
| <i>seb</i> | seb-F  | ACACCCAACGTT TTAGCAGAGAG          | 81           | [5]        |
|            | seb-R  | CCATCAAACCAGTGAATTTAGTCG          |              |            |
| <i>sec</i> | sec-F  | AATAAAACGGTTGATTCTAAAAGTGTGAA     | 80           | [5]        |
|            | sec-R  | ATCAAAATCGGATTAACATTATCCATTC      |              |            |
| <i>see</i> | see-F  | TCAATGTGCTGGAGGCACACCAA           | 51           | [6]        |
|            | see-R  | ACACCCCCGTACATA CATGCTGTT         |              |            |
| 16S        | 16S-F  | AAGTCCCAGCAACGAGCGCAA             | 86           | [6]        |
| rRNA       | 16S-R  | CCTCCGGTTTGTACCCGGCA              |              |            |

## References

1. Park, J.Y.; Fox, L.K.; Seo, K.S.; McGuire, M.A.; Park, Y.H.; Rurangirwa, F.R.; Sischo, W.M.; Bohach, G.A. Detection of Classical and Newly Described Staphylococcal Superantigen Genes in Coagulase-Negative Staphylococci Isolated from Bovine Intramammary Infections. *Vet. Microbiol.* **2011**, *147*, 149–154.
2. Johnson, W.M.; Tyler, S.D.; Ewan, E.P.; Ashton, F.E.; Pollard, D.R.; Rozee, K.R. Detection of genes for enterotoxins, exfoliative toxins, and toxic shock syndrome toxin 1 in *Staphylococcus aureus* by the polymerase chain reaction. *J. Clin. Microbiol.* **1991**, *29*, 426–430.
3. Becker, K.; Roth, R.; Peters, G. Rapid and specific detection of toxigenic *Staphylococcus aureus*: use of two multiplex PCR enzyme immunoassays for amplification and hybridization of staphylococcal enterotoxin genes, exfoliative toxin genes, and toxic shock syndrome toxin 1 gene. *J. Clin. Microbiol.* **1998**, *36*, 2548–2553.
4. Ciftci, A.; Findik, A.; Onuk, E.E.; Savasan, S. Detection of methicillin resistance and slime factor production of *Staphylococcus aureus* in bovine mastitis” *Braz. J. Microbiol.* **1958**, *40*, 254–261.
5. Klotz, M.; Oppen, S.; Heeg, K.; Zimmermann, S. Detection of *Staphylococcus aureus* enterotoxins A to D by real-time fluorescence PCR assay. *J. Clin. Microbiol.* **2003**, *41*, 4683–4687.
6. Bastos, C.P.; Bassani, M.T.; Mata, M.M.; Lopes, G.V.; da Silva, W.P. Prevalence and expression of staphylococcal enterotoxin genes in *Staphylococcus aureus* isolated from food poisoning outbreaks. *Can. J. Microbiol.* **2017**, *63*, 834–840.
